# Supplementary material for: Increasing prevalence of eating disorders in female adolescents compared with children and young adults: an analysis of real-time administrative data
Source: PubMed Central journal article supplement — Gen Psychiatr. 2024 Aug 1;37(4):e101584. doi: 10.1136/gpsych-2024-101584 (PMC11298723; doi:10.1136/gpsych-2024-101584), 2024-08-01
Supplement: gpsych-37-4-s001.pdf [file gpsych-37-4-s001.pdf]

Supplemental Figure (eFigure) 1. Flow Diagram of Subject Enrolment in TriNetx

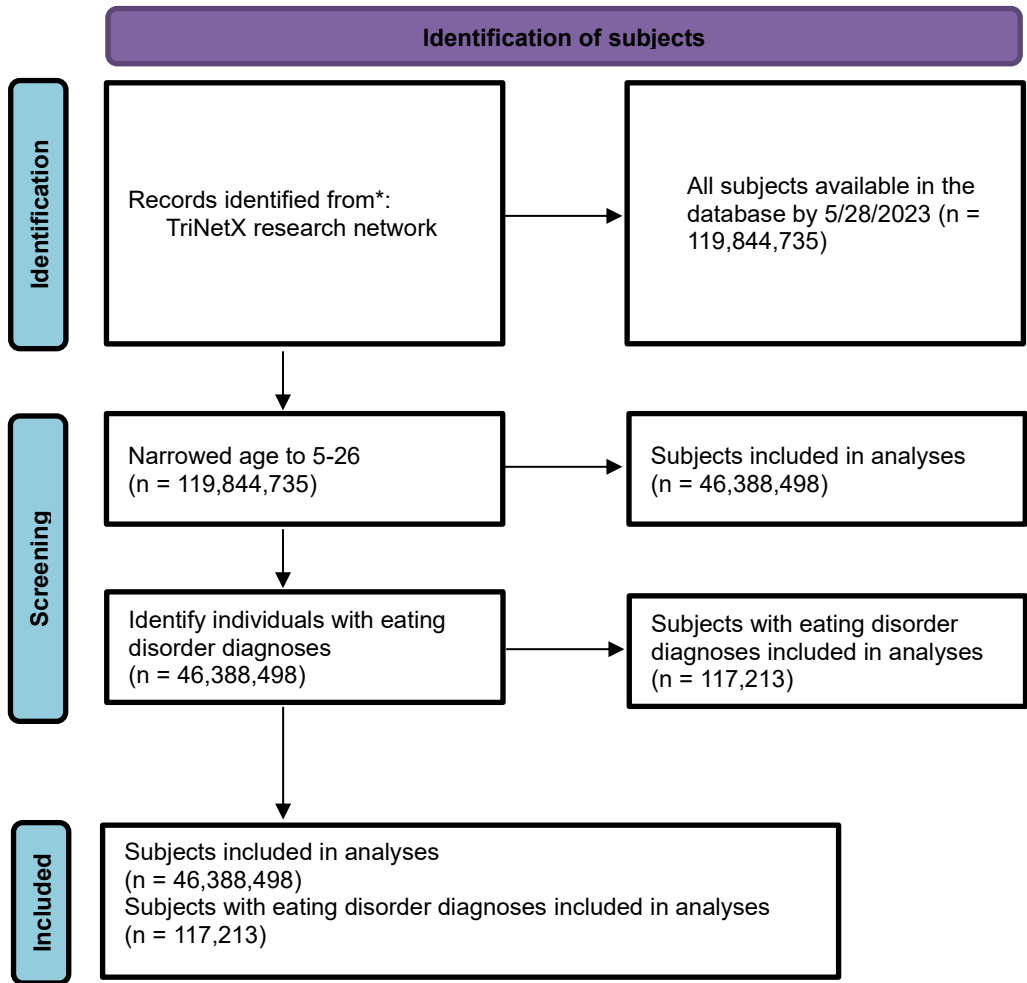

Supplemental Table (eTable) 1. Mean ages of patients with eating disorders

|                            | 2017            | 2018            | 2019            | 2020            | 2021            | 2022            |
|----------------------------|-----------------|-----------------|-----------------|-----------------|-----------------|-----------------|
| Age, year,<br>Mean<br>(SE) | 18.66<br>(0.05) | 17.77<br>(0.05) | 17.51<br>(0.04) | 17.64<br>(0.04) | 17.49<br>(0.03) | 17.01<br>(0.03) |

SE: standardized error
